# Supplementary material for: Sternalis muscle in jordanian population: a prevalence study and level of physicians’ awareness
Source: PubMed Central journal article supplement — Anat Cell Biol. 2020 Dec 31;53(4):411–6. doi: 10.5115/acb.20.038 (PMC7769105; doi:10.5115/acb.20.038), 2020-12-31
Supplement: ACB-53-411_Supple.pdf [file ACB-53-411_Supple.pdf]

Supplementary data: The questionnaire about awareness and identification of SM

We are conducting a study about the prevalence and awareness about some anatomical structures using CT images. We would be thankful if you answered these three questions.

The researchers

1- Which choice describes your current position?

- Surgery resident
- Radiology resident
- Intern doctor

2- Please identify Structure X

.....

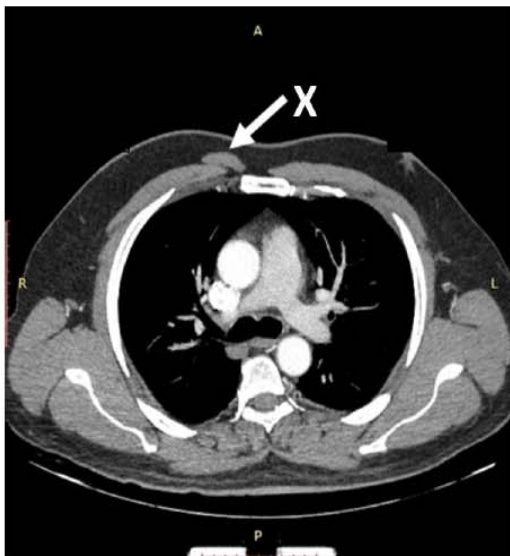

3- Please identify structure Z

.....

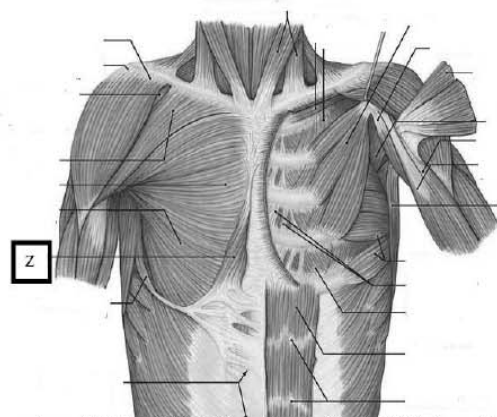

Reference: Saxena A.K., Alalayet Y.F. (2017) Surgical Anatomy of the Chest Wall. In: Saxena A. (eds) Chest Wall Deformities. Springer, Berlin, Heidelberg

Thank you for your corporation with our research group.
